# Supplementary material for: Visible light sensitization of TiO2 nanoparticles by a dietary pigment, curcumin, for environmental photochemical transformations
Source: Royal Society of Chemistry journal article supplement (doi:10.1039/c7ra05276f), 2017-01-01
Supplement: c7ra05276f1.pdf [file c7ra05276f1.pdf]

*Electronic Supplementary Information (ESI)*

**Visible Light Sensitization of TiO<sub>2</sub> Nanoparticles by a Dietary  
Pigment, Curcumin, for Environmental Photochemical  
Transformations**

Jonghun Lim, Alok D. Bokare, and Wonyong Choi\*

*Division of Environmental Science and Engineering, Pohang University of Science and  
Technology (POSTECH), Pohang 37673, Korea.*

\*Corresponding author e-mail: [wchoi@postech.edu](mailto:wchoi@postech.edu) ; Fax: +82-54-279-8299

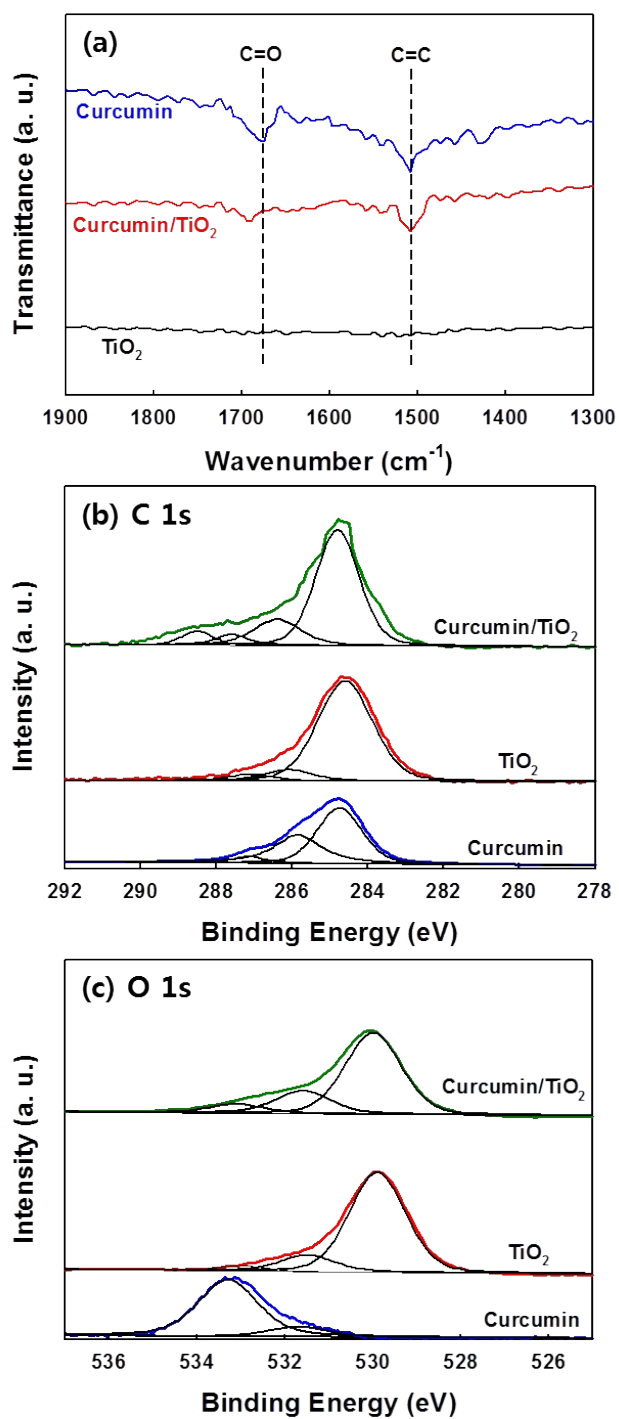

**Fig. S1.** (a) FT-IR transmittance spectra, and XPS spectra of (b) C 1s and (c) O 1s bands of TiO<sub>2</sub>, curcumin, and curcumin/TiO<sub>2</sub>.

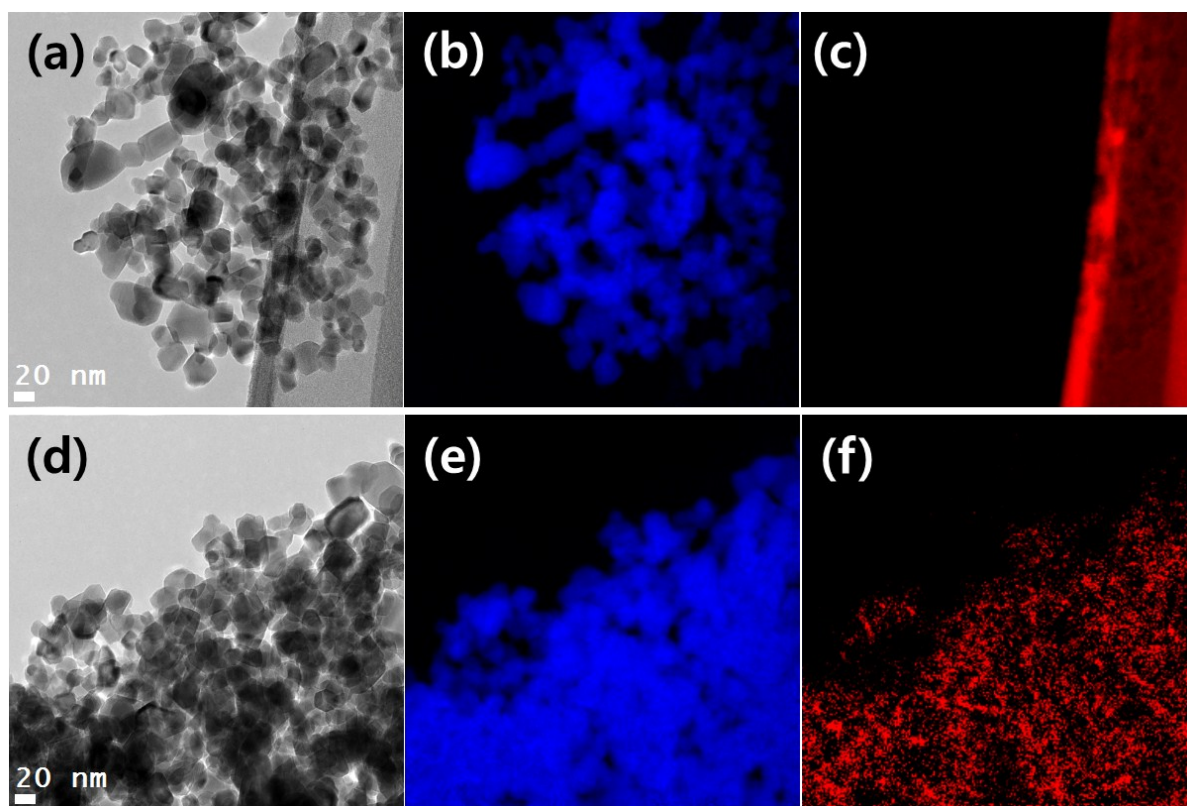

**Fig. S2.** (a) TEM image and EELS mapping of (b) Ti and (c) C of bare TiO<sub>2</sub> and (d) TEM image and EELS mapping of (e) Ti and (f) C of curcumin/TiO<sub>2</sub>.

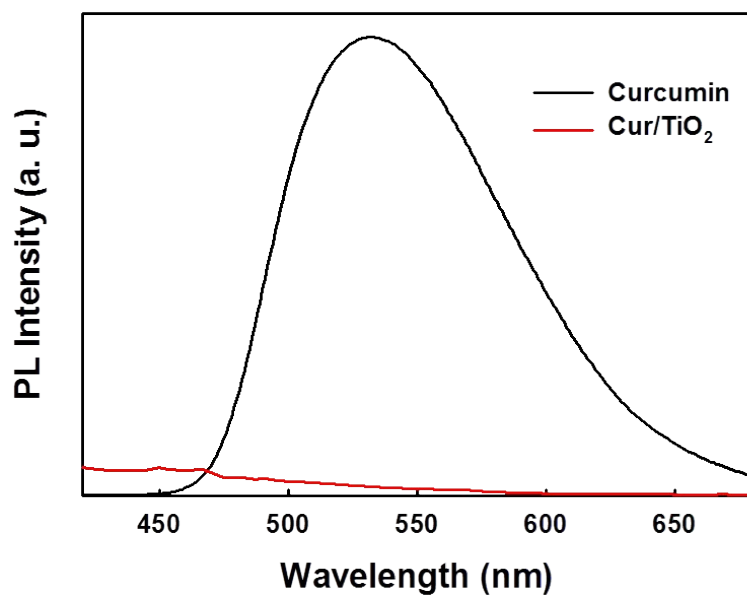

**Fig. S3.** Photoluminescence emission spectra of curcumin solution and curcumin/TiO<sub>2</sub> suspension;  $\lambda_{\text{ex.}} = 350$  nm.

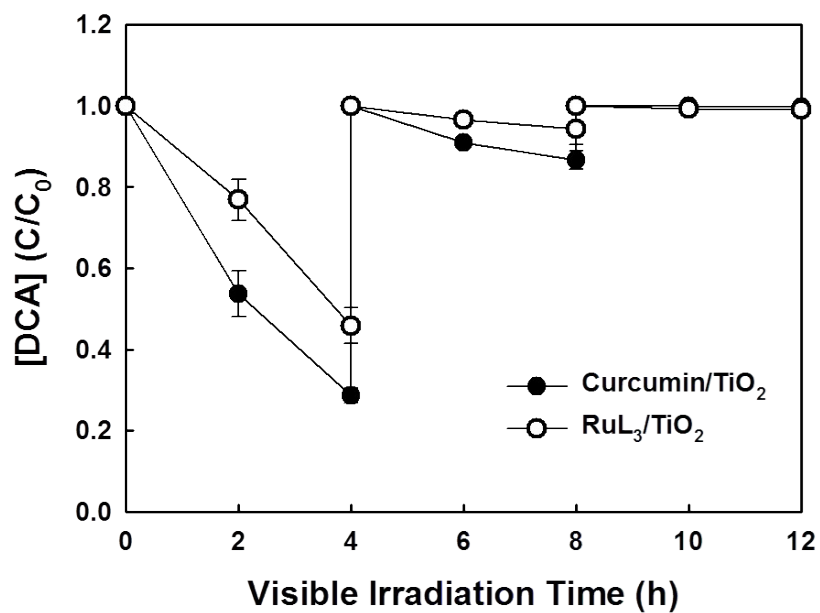

**Fig. S4.** Repeated cycles of the degradation of DCA in the suspension of dye/ $TiO_2$  under visible light. The experimental conditions were [catalyst] = 0.5 g/L,  $[DCA]_0 = 100 \mu M$ ,  $pH_0 = 3.0$ ,  $\lambda > 420 \text{ nm}$ , air-equilibrated for 30 min prior to irradiation.
